# Supplementary material
Source: MDPI journal article supplement (https://www.mdpi.com/2071-1050/12/22/9420)
Supplement: s1 [file s1]

Supplementary Materials: Data sheet used to organize information gathered from the CAMCs’ minute books in the Annapurna Conservation Area, Nepal

| Date of Meetings<br>(Day/Month/Year) | Meeting<br>Interval | Number of members present in a meeting |      |        |             |            |           |           | Total number<br>of decisions<br>made | Pages of<br>minutes |
|--------------------------------------|---------------------|----------------------------------------|------|--------|-------------|------------|-----------|-----------|--------------------------------------|---------------------|
|                                      |                     | Total                                  | Male | Female | Lower caste | CAMC chair | Secretary | VDC chair |                                      |                     |
